# Supplementary material for: Promising density functional theory methods for predicting the structures of uranyl complexes
Source: Royal Society of Chemistry journal article supplement (doi:10.1039/c4ra08264h), 2014-01-01
Supplement: c4ra08264h1.pdf [file c4ra08264h1.pdf]

## Supporting Information

### **Promising Density Functional Theory Methods for Predicting the Structures of Uranyl Complexes**

Hai-Zhu Yu, Can Li, Bai-Hua Chen, Chu-Ting Yang, Dong-Rui Wang, Yao Fu, Sheng Hu,\* Zhi-Min Dang\*

*Department of Polymer Science and Engineering, University of Science and Technology  
Beijing, Beijing 100083, China*

*Institute of Nuclear Physics and Chemistry, CAEP, Mianyang, 621900, China.*

*Department of Chemistry, University of Science and Technology of China, Hefei 230026,  
China.*

Emails: [dangzm@ustb.edu.cn](mailto:dangzm@ustb.edu.cn); [husheng@126.com](mailto:husheng@126.com)

## **Table of Contents**

|                                                                                |           |
|--------------------------------------------------------------------------------|-----------|
| <b>Full citation of reference 20 .....</b>                                     | <b>S3</b> |
| <b>Comparison between 6-311G(d,p) and 6-311++G(d,p) .....</b>                  | <b>S4</b> |
| <b>Calculated bond distances with BB1K, CAM-B3LYP and LC-BLYP methods.....</b> | <b>S5</b> |
| <b>NBO analysis on 8.....</b>                                                  | <b>S7</b> |
| <b>Cartesian coordinates of complexes calculated with M2-B1 method.....</b>    | <b>S8</b> |

## **Full citation of reference 20**

M. J. Frisch, G. W. Trucks, H. B. Schlegel, G. E. Scuseria, M. A. Robb, J. R. Cheeseman, G. Scalmani, V. Barone, B. Mennucci, G. A. Petersson, H. Nakatsuji, M. Caricato, X. Li, H. P. Hratchian, A. F. Izmaylov, J. Bloino, G. Zheng, J. L. Sonnenberg, M. Hada, M. Ehara, K. Toyota, R. Fukuda, J. Hasegawa, M. Ishida, T. Nakajima, Y. Honda, O. Kitao, H. Nakai, T. Vreven, J. A. Montgomery, Jr., J. E. Peralta, F. Ogliaro, M. Bearpark, J. J. Heyd, E. Brothers, K. N. Kudin, V. N. Staroverov, T. Keith, R. Kobayashi, J. Normand, K. Raghavachari, A. Rendell, J. C. Burant, S. S. Iyengar, J. Tomasi, M. Cossi, N. Rega, J. M. Millam, M. Klene, J. E. Knox, J. B. Cross, V. Bakken, C. Adamo, J. Jaramillo, R. Gomperts, R. E. Stratmann, O. Yazyev, A. J. Austin, R. Cammi, C. Pomelli, J. W. Ochterski, R. L. Martin, K. Morokuma, V. G. Zakrzewski, G. A. Voth, P. Salvador, J. J. Dannenberg, S. Dapprich, A. D. Daniels, O. Farkas, J. B. Foresman, J. V. Ortiz, J. Cioslowski, and D. J. Fox, Gaussian, Inc., Wallingford CT, 2010.

## Comparison between 6-311G(d,p) and 6-311++G(d,p)

Considering that the two total electron basis set are mainly differentiated by the diffuse function, we chose complexes **2** and **10** as samples to evaluate the relative performance of them. The related calculation results in Table S1 indicate that the calculated bond distances of **2** are quite close with different basis sets, while the deviations of the bond distances calculated at 6-311++G(d,p) basis is relatively larger for bulky complex **10** (than the related ones calculated with 6-311G(d,p) method). The observation might be related to the inclusion of the diffuse functionals in 6-311++G(d,p) basis set, which slightly overestimates the steric hindrance between different ligand when the uranyl center is bulky. According to these additional calculation results, we suggest that 6-311G(d,p) is a better choice.

Table S1

| Compound                                                                           | U-X               | BD <sup>exp</sup> | BD <sup>6-311G(d,p)</sup> | BD <sup>6-311++G(d,p)</sup> |
|------------------------------------------------------------------------------------|-------------------|-------------------|---------------------------|-----------------------------|
| 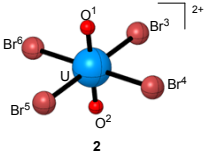  | U-O <sup>1</sup>  | 1.766             | 1.730                     | 1.730                       |
|                                                                                    | U-O <sup>2</sup>  | 1.766             | 1.730                     | 1.730                       |
|                                                                                    | U-Br <sup>3</sup> | 2.814             | 2.884                     | 2.881                       |
|                                                                                    | U-Br <sup>4</sup> | 2.816             | 2.884                     | 2.881                       |
|                                                                                    | U-Br <sup>5</sup> | 2.814             | 2.884                     | 2.881                       |
|                                                                                    | U-Br <sup>6</sup> | 2.816             | 2.884                     | 2.881                       |
|  | U-O <sup>1</sup>  | 1.789             | 1.759                     | 1.791                       |
|                                                                                    | U-O <sup>2</sup>  | 1.789             | 1.759                     | 1.791                       |
|                                                                                    | U-N <sup>3</sup>  | 2.316             | 2.298                     | 2.252                       |
|                                                                                    | U-O <sup>4</sup>  | 2.432             | 2.447                     | 2.398                       |
|                                                                                    | U-N <sup>5</sup>  | 2.317             | 2.298                     | 2.252                       |
|                                                                                    | U-O <sup>6</sup>  | 2.445             | 2.439                     | 2.402                       |

### Calculated bond distances with BB1K, CAM-B3LYP and LC-BLYP methods

| Compound                                                                                     | U-X               | BD <sup>exp</sup> | BD <sup>M2-B1</sup> | BD <sup>M6-B1</sup> | BD <sup>M7-B2</sup> |
|----------------------------------------------------------------------------------------------|-------------------|-------------------|---------------------|---------------------|---------------------|
| 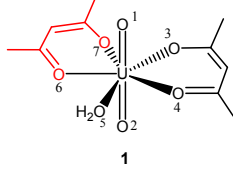 <p>1</p>   | U-O <sup>1</sup>  | 1.733             | 1.735               | 1.757               | 1.738               |
|                                                                                              | U-O <sup>2</sup>  | 1.753             | 1.738               | 1.761               | 1.741               |
|                                                                                              | U-O <sup>3</sup>  | 2.338             | 2.319               | 2.329               | 2.318               |
|                                                                                              | U-O <sup>4</sup>  | 2.385             | 2.411               | 2.438               | 2.41                |
|                                                                                              | U-O <sup>5</sup>  | 2.488             | 2.531               | 2.537               | 2.496               |
|                                                                                              | U-O <sup>6</sup>  | 2.382             | 2.404               | 2.407               | 2.41                |
|                                                                                              | U-O <sup>7</sup>  | 2.349             | 2.319               | 2.327               | 2.318               |
|  <p>2</p>   | U-O <sup>1</sup>  | 1.766             | 1.73                | 1.751               | 1.729               |
|                                                                                              | U-O <sup>2</sup>  | 1.766             | 1.73                | 1.751               | 1.729               |
|                                                                                              | U-Br <sup>3</sup> | 2.814             | 2.884               | 2.909               | 2.887               |
|                                                                                              | U-Br <sup>4</sup> | 2.816             | 2.884               | 2.909               | 2.887               |
|                                                                                              | U-Br <sup>5</sup> | 2.814             | 2.884               | 2.909               | 2.887               |
|                                                                                              | U-Br <sup>6</sup> | 2.816             | 2.884               | 2.909               | 2.887               |
|  <p>3</p>  | U-O <sup>1</sup>  | 1.650             | 1.741               | 1.773               | 1.752               |
|                                                                                              | U-O <sup>2</sup>  | 1.662             | 1.751               | 1.764               | 1.744               |
|                                                                                              | U-N <sup>3</sup>  | 2.595             | 2.673               | 2.693               | 2.677               |
|                                                                                              | U-O <sup>4</sup>  | 2.299             | 2.209               | 2.217               | 2.207               |
|                                                                                              | U-O <sup>5</sup>  | 2.215             | 2.223               | 2.223               | 2.212               |
|                                                                                              | U-N <sup>6</sup>  | 2.601             | 2.625               | 2.674               | 2.656               |
|                                                                                              | U-S <sup>7</sup>  | 2.964             | 2.962               | 3.014               | 2.976               |
|  <p>4</p> | U-O <sup>1</sup>  | 1.769             | 1.737               | 1.759               | 1.739               |
|                                                                                              | U-O <sup>2</sup>  | 1.768             | 1.737               | 1.759               | 1.739               |
|                                                                                              | U-O <sup>3</sup>  | 2.303             | 2.303               | 2.352               | 2.334               |
|                                                                                              | U-N <sup>4</sup>  | 2.493             | 2.582               | 2.619               | 2.604               |
|                                                                                              | U-N <sup>5</sup>  | 2.521             | 2.428               | 2.452               | 2.446               |
|                                                                                              | U-N <sup>6</sup>  | 2.470             | 2.6                 | 2.603               | 2.59                |
|                                                                                              | U-O <sup>7</sup>  | 2.321             | 2.344               | 2.311               | 2.299               |
|  <p>5</p> | U-O <sup>1</sup>  | 1.777             | 1.741               | 1.773               | 1.741               |
|                                                                                              | U-O <sup>2</sup>  | 1.778             | 1.748               | 1.761               | 1.753               |
|                                                                                              | U-O <sup>3</sup>  | 2.337             | 2.354               | 2.356               | 2.34                |
|                                                                                              | U-O <sup>4</sup>  | 2.337             | 2.354               | 2.356               | 2.341               |
|                                                                                              | U-O <sup>5</sup>  | 2.442             | 2.407               | 2.442               | 2.424               |
|                                                                                              | U-O <sup>6</sup>  | 2.366             | 2.369               | 2.388               | 2.375               |
|                                                                                              | U-O <sup>7</sup>  | 2.442             | 2.407               | 2.442               | 2.424               |

|                                                                                                                                  |                         |              |       |       |       |
|----------------------------------------------------------------------------------------------------------------------------------|-------------------------|--------------|-------|-------|-------|
| 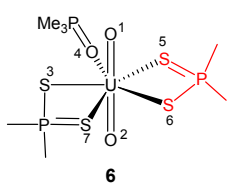 <p style="text-align: center;"><b>6</b></p>    | <b>U-O<sup>1</sup></b>  | 1.741        | 1.739 | 1.758 | 1.738 |
|                                                                                                                                  | <b>U-O<sup>2</sup></b>  | 1.743        | 1.729 | 1.747 | 1.727 |
|                                                                                                                                  | <b>U-S<sup>3</sup></b>  | 2.867        | 2.874 | 2.924 | 2.896 |
|                                                                                                                                  | <b>U-O<sup>4</sup></b>  | 2.317        | 2.345 | 2.36  | 2.336 |
|                                                                                                                                  | <b>U-S<sup>5</sup></b>  | 2.867        | 2.902 | 2.929 | 2.901 |
|                                                                                                                                  | <b>U-S<sup>6</sup></b>  | 2.881        | 2.869 | 2.917 | 2.889 |
|                                                                                                                                  | <b>U-S<sup>7</sup></b>  | 2.881        | 2.862 | 2.914 | 2.886 |
|  <p style="text-align: center;"><b>7</b></p>    | <b>U-O<sup>1</sup></b>  | 1.765        | 1.735 | 1.756 | 1.736 |
|                                                                                                                                  | <b>U-O<sup>2</sup></b>  | 1.766        | 1.735 | 1.756 | 1.736 |
|                                                                                                                                  | <b>U-Cl<sup>3</sup></b> | 2.697        | 2.686 | 2.705 | 2.693 |
|                                                                                                                                  | <b>U-O<sup>4</sup></b>  | 2.466        | 2.503 | 2.528 | 2.487 |
|                                                                                                                                  | <b>U-O<sup>5</sup></b>  | 2.464        | 2.513 | 2.526 | 2.49  |
|                                                                                                                                  | <b>U-Cl<sup>6</sup></b> | 2.687        | 2.673 | 2.703 | 2.693 |
|                                                                                                                                  | <b>U-O<sup>7</sup></b>  | 2.444        | 2.433 | 2.446 | 2.416 |
|  <p style="text-align: center;"><b>8</b></p>   | <b>U-O<sup>1</sup></b>  | 1.688        | 1.736 | 1.759 | 1.739 |
|                                                                                                                                  | <b>U-O<sup>2</sup></b>  | 1.725        | 1.737 | 1.758 | 1.739 |
|                                                                                                                                  | <b>U-O<sup>3</sup></b>  | 2.417        | 2.454 | 2.465 | 2.444 |
|                                                                                                                                  | <b>U-O<sup>4</sup></b>  | 2.424        | 2.474 | 2.489 | 2.467 |
|                                                                                                                                  | <b>U-O<sup>5</sup></b>  | 2.412        | 2.474 | 2.489 | 2.467 |
|                                                                                                                                  | <b>U-O<sup>6</sup></b>  | 2.401        | 2.454 | 2.465 | 2.444 |
|                                                                                                                                  | <b>U-N<sup>7</sup></b>  | <b>2.382</b> | 2.279 | 2.293 | 2.287 |
|  <p style="text-align: center;"><b>9</b></p>  | <b>U-O<sup>1</sup></b>  | 1.751        | 1.713 | 1.734 | 1.716 |
|                                                                                                                                  | <b>U-O<sup>2</sup></b>  | 1.751        | 1.713 | 1.734 | 1.716 |
|                                                                                                                                  | <b>U-O<sup>3</sup></b>  | 2.402        | 2.472 | 2.479 | 2.459 |
|                                                                                                                                  | <b>U-O<sup>4</sup></b>  | 2.384        | 2.465 | 2.472 | 2.46  |
|                                                                                                                                  | <b>U-O<sup>5</sup></b>  | 2.384        | 2.465 | 2.472 | 2.459 |
|                                                                                                                                  | <b>U-O<sup>6</sup></b>  | 2.402        | 2.461 | 2.479 | 2.459 |
|                                                                                                                                  | <b>U-N<sup>7</sup></b>  | 2.455        | 2.472 | 2.467 | 2.458 |
|  <p style="text-align: center;"><b>10</b></p> | <b>U-O<sup>1</sup></b>  | 1.789        | 1.759 | 1.779 | 1.759 |
|                                                                                                                                  | <b>U-O<sup>2</sup></b>  | 1.789        | 1.759 | 1.779 | 1.759 |
|                                                                                                                                  | <b>U-N<sup>3</sup></b>  | 2.316        | 2.298 | 2.327 | 2.311 |
|                                                                                                                                  | <b>U-O<sup>4</sup></b>  | 2.432        | 2.447 | 2.485 | 2.448 |
|                                                                                                                                  | <b>U-N<sup>5</sup></b>  | 2.317        | 2.298 | 2.327 | 2.311 |
|                                                                                                                                  | <b>U-O<sup>6</sup></b>  | 2.445        | 2.439 | 2.481 | 2.444 |

## NBO analysis on 8

The Wiberg bond order of the equatorial U-X bonds are given in Figure S1. the Wiberg bond order of U-N bond is about double that of the dative/covalent U-O single bonds in the 1,3-diketone ligand. The observation provide extra evidence for the double bond character of the U-N(azide) bond, and thus supports our conclusion that **8c** represents the main resonance structure of **8**.

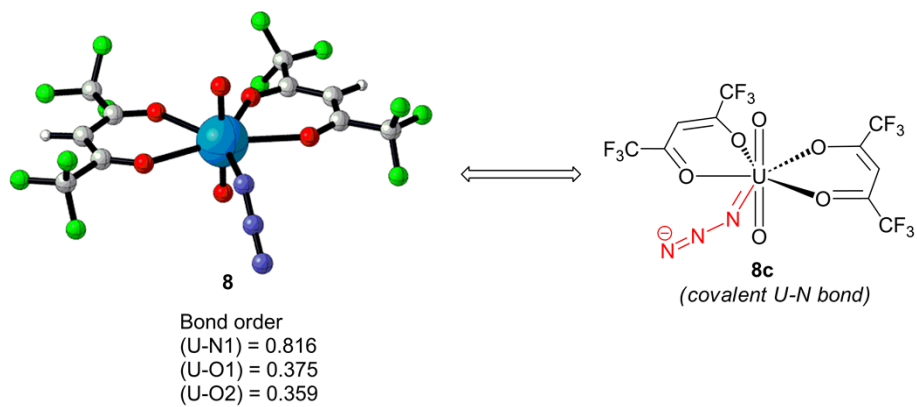

**Cartesian coordinates of all complexes  
calculated at BB1K/(SDD-MWB60:6-  
311G(d,p)) method.**

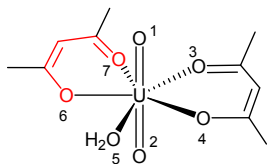

**1**

|   |             |             |             |
|---|-------------|-------------|-------------|
| U | -0.00202800 | -0.13795900 | 0.03127100  |
| O | 0.01788200  | -2.66697500 | 0.11467100  |
| O | -0.00268400 | -0.08284700 | 1.76539800  |
| O | -1.65065800 | 1.49143200  | -0.03024900 |
| O | -2.16329200 | -1.18736400 | -0.04243000 |
| O | 2.16826300  | -1.18602500 | -0.03842400 |
| O | 1.64642000  | 1.49240100  | -0.02835600 |
| O | 0.00028600  | -0.23973500 | -1.70403100 |
| C | -3.43801700 | 2.99399900  | -0.04099300 |
| C | -2.90257200 | 1.59963100  | -0.02863600 |
| C | -3.78092400 | 0.52019100  | -0.01820100 |
| C | -3.36179600 | -0.80839600 | -0.03140000 |
| C | -4.38980400 | -1.89567800 | -0.03998000 |
| C | 4.39811200  | -1.88483400 | -0.03927000 |
| C | 3.36559700  | -0.80181100 | -0.03015200 |
| C | 3.77963400  | 0.52799000  | -0.01938000 |
| C | 2.89762200  | 1.60480200  | -0.02913000 |
| C | 3.42871000  | 3.00082300  | -0.04333000 |
| H | -3.05612500 | 3.50827200  | -0.91895300 |
| H | -3.05960000 | 3.52252200  | 0.83001400  |
| H | -4.52099100 | 3.02506700  | -0.04324700 |
| H | -4.83684900 | 0.72140400  | -0.01322300 |
| H | -4.25768400 | -2.49944000 | -0.93453100 |
| H | -5.40327000 | -1.51366400 | -0.01296500 |
| H | -4.22371700 | -2.54352200 | 0.81680500  |
| H | 5.40998600  | -1.49850300 | -0.01460700 |
| H | 4.26717600  | -2.49019300 | -0.93295300 |
| H | 4.23669500  | -2.53232700 | 0.81871300  |
| H | 4.83487100  | 0.73280100  | -0.01646400 |
| H | 3.05154400  | 3.52809600  | 0.82898400  |
| H | 3.04216300  | 3.51388600  | -0.91994000 |
| H | 4.51156000  | 3.03537500  | -0.04915700 |
| H | -0.74301300 | -2.98376800 | -0.36731800 |
| H | 0.82472600  | -2.94114300 | -0.31794500 |

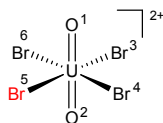

**2**

|    |             |             |            |
|----|-------------|-------------|------------|
| Br | 0.00013700  | -2.88389300 | 0.00000000 |
| Br | -0.00041000 | 2.88391100  | 0.00000000 |
| Br | 0.00013700  | -0.00001600 | 2.88390200 |
| O  | -1.72952800 | -0.00013800 | 0.00000000 |
| O  | 1.72952500  | 0.00015400  | 0.00000000 |

|    |             |             |             |
|----|-------------|-------------|-------------|
| U  | -0.00000100 | 0.00000400  | 0.00000000  |
| Br | 0.00013700  | -0.00001600 | -2.88390200 |

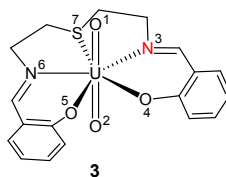

**3**

|   |             |             |             |
|---|-------------|-------------|-------------|
| U | -0.03920900 | 0.12288000  | 0.02283300  |
| S | -0.26485600 | 3.02569300  | -0.52254300 |
| O | 0.43153900  | 0.60448300  | 1.63939400  |
| O | -0.53284800 | -0.13633800 | -1.62688600 |
| O | 1.55290200  | -1.40216500 | -0.11266200 |
| O | -1.53277600 | -1.38318000 | 0.68724800  |
| N | 2.30310700  | 1.24114100  | -0.61569300 |
| N | -2.36624100 | 1.24939100  | 0.47616700  |
| C | 1.43036000  | 3.44874900  | -0.07642200 |
| C | 2.34026600  | 2.64247100  | -0.97657000 |
| C | 3.44974400  | 0.68780500  | -0.49323100 |
| C | 3.78161300  | -0.66579500 | -0.16294200 |
| C | 5.13701900  | -0.98839100 | -0.04048700 |
| C | 5.54536100  | -2.26012100 | 0.26039500  |
| C | 4.57674900  | -3.24690600 | 0.43750400  |
| C | 3.24104000  | -2.96487300 | 0.31608900  |
| C | 2.80542000  | -1.66678800 | 0.01524600  |
| C | -3.46372600 | 0.65067400  | 0.20553200  |
| C | -3.67620000 | -0.74114300 | -0.05257900 |
| C | -2.69993600 | -1.71649300 | 0.24897500  |
| C | -3.05482500 | -3.06433700 | 0.09489600  |
| C | -4.29620700 | -3.41791300 | -0.36506600 |
| C | -5.25895600 | -2.45612200 | -0.67044300 |
| C | -4.94395700 | -1.13665200 | -0.49390000 |
| C | -1.16790900 | 3.30544800  | 1.01596200  |
| C | -2.51422600 | 2.64315800  | 0.86717000  |
| H | 1.58987500  | 4.51373600  | -0.20980300 |
| H | 1.59443700  | 3.17443400  | 0.96224100  |
| H | 2.01633800  | 2.75438400  | -2.01242200 |
| H | 3.35474000  | 3.03963700  | -0.91134600 |
| H | 4.32908900  | 1.31387000  | -0.65977000 |
| H | 5.86802500  | -0.20595400 | -0.18756600 |
| H | 6.59210100  | -2.49509300 | 0.35554200  |
| H | 4.88217000  | -4.25506500 | 0.67315700  |
| H | 2.48991700  | -3.72580800 | 0.44866000  |
| H | -4.38081500 | 1.24458400  | 0.19802700  |
| H | -2.31223200 | -3.80600500 | 0.33838900  |
| H | -4.53269300 | -4.46389700 | -0.48839500 |
| H | -6.23318100 | -2.74843200 | -1.02455700 |
| H | -5.67927400 | -0.37197500 | -0.70004800 |
| H | -0.60691600 | 2.84419400  | 1.82267800  |
| H | -1.27888200 | 4.36955300  | 1.19686800  |
| H | -3.02939400 | 2.70866000  | 1.82471300  |
| H | -3.11678000 | 3.18034400  | 0.13283000  |



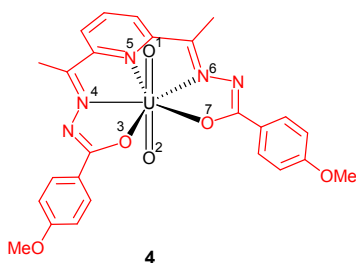

|   |             |             |             |
|---|-------------|-------------|-------------|
| U | 0.01246700  | 0.40008700  | 0.00020700  |
| O | 0.00654000  | 0.42944200  | -1.73621900 |
| O | 0.00639700  | 0.43024200  | 1.73661700  |
| O | -1.97379900 | -0.84527600 | 0.00039100  |
| O | 1.96198600  | -0.82646300 | 0.00056100  |
| O | -7.37007100 | -4.00565100 | -0.00008200 |
| O | 7.33033500  | -4.03751200 | -0.00022600 |
| N | -2.27922500 | 1.62707700  | -0.00013800 |
| N | -0.00795400 | 2.82809000  | -0.00015700 |
| N | 2.26695100  | 1.65708000  | 0.00004900  |
| N | -3.40690900 | 0.93410400  | -0.00013200 |
| N | 3.40752300  | 0.94040200  | 0.00006900  |
| C | -3.14207200 | -0.36948100 | 0.00008600  |
| C | -4.28109100 | -1.28692400 | 0.00007200  |
| C | -5.58715300 | -0.82464200 | -0.00059900 |
| C | -6.65024300 | -1.70351400 | -0.00068300 |
| C | -6.40863800 | -3.07100700 | -0.00006100 |
| C | -5.10026000 | -3.54327500 | 0.00064300  |
| C | -4.05237800 | -2.66011600 | 0.00069000  |
| C | -2.36011900 | 2.91960800  | -0.00020800 |
| C | -1.07105300 | 3.55622600  | -0.00018500 |
| C | -0.71301600 | 5.00297400  | -0.00025500 |
| C | 0.77511700  | 4.94037200  | -0.00023000 |
| C | 1.12465200  | 3.64596300  | -0.00017700 |
| C | 2.38499500  | 2.93850900  | -0.00011200 |
| C | 3.14129500  | -0.34376600 | 0.00031700  |
| C | 4.27154200  | -1.27827500 | 0.00028000  |
| C | 5.58293800  | -0.83370100 | -0.00016100 |
| C | 6.63540700  | -1.72610100 | -0.00031800 |
| C | 6.37768400  | -3.09029500 | -0.00048000 |
| C | 5.06461300  | -3.54488500 | 0.00045700  |
| C | 4.02711900  | -2.64735700 | 0.00060500  |
| C | -8.70567000 | -3.58268800 | -0.00085800 |
| C | -3.64772100 | 3.65467600  | -0.00023700 |
| C | 3.69317300  | 3.63503800  | -0.00027500 |
| C | 8.66855800  | -3.62641900 | -0.00130100 |
| H | -5.76084700 | 0.23798700  | -0.00106400 |
| H | -7.65563400 | -1.31955300 | -0.00122000 |
| H | -4.94181000 | -4.60888200 | 0.00113000  |
| H | -3.03507500 | -3.01402500 | 0.00119900  |
| H | -1.12421000 | 5.51078800  | -0.87450400 |
| H | -1.12424700 | 5.51095300  | 0.87387600  |
| H | 1.42521800  | 5.79423600  | -0.00020800 |
| H | 5.76916400  | 0.22701300  | -0.00038600 |
| H | 7.64538600  | -1.35394200 | -0.00062900 |
| H | 4.89177300  | -4.60836600 | 0.00068000  |
| H | 3.00575500  | -2.98901700 | 0.00095600  |
| H | -9.30714800 | -4.48239000 | -0.00085500 |
| H | -8.93598900 | -2.99574200 | 0.88743300  |
| H | -8.93513200 | -2.99631600 | -0.88974800 |
| H | -4.23523900 | 3.37529800  | 0.87097600  |
| H | -3.49741700 | 4.72908800  | -0.00044700 |

|   |             |             |             |
|---|-------------|-------------|-------------|
| H | -4.23540200 | 3.37498400  | -0.87123500 |
| H | 3.57247500  | 4.71231700  | 0.00009200  |
| H | 4.26997300  | 3.33467500  | 0.87040000  |
| H | 4.26942000  | 3.33525500  | -0.87153100 |
| H | 8.90528400  | -3.04143500 | 0.88690400  |
| H | 9.26311700  | -4.53092100 | -0.00200800 |
| H | 8.90370800  | -3.04104200 | -0.88966200 |

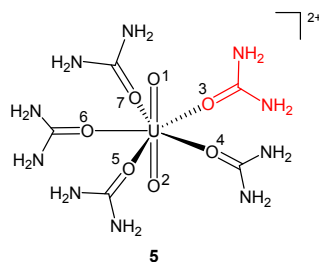

|   |             |             |             |
|---|-------------|-------------|-------------|
| U | 0.00003700  | 0.07851200  | 0.07568700  |
| O | 1.42335700  | 1.94544100  | 0.25143900  |
| O | 2.28136500  | -0.68693500 | 0.02759600  |
| O | -0.00057400 | -2.26439700 | -0.27262000 |
| O | 0.00002500  | 0.24909500  | -1.65722800 |
| O | 0.00004500  | -0.13832900 | 1.80979500  |
| C | 2.31910900  | 2.55494700  | -0.36937000 |
| C | 3.12137000  | -1.10775300 | 0.85585600  |
| C | -0.00097000 | -3.10749300 | -1.19336900 |
| N | 3.02907700  | 1.95273700  | -1.32111900 |
| N | 2.57088600  | 3.82849300  | -0.08033400 |
| N | 2.90105900  | -1.05429000 | 2.16516400  |
| N | 4.27314800  | -1.61632900 | 0.42051500  |
| N | -0.00084700 | -2.74473300 | -2.47443200 |
| N | -0.00153800 | -4.40459500 | -0.89317000 |
| O | -1.42237000 | 1.94615400  | 0.25142200  |
| O | -2.28169500 | -0.68583600 | 0.02779000  |
| C | -2.31775300 | 2.55597200  | -0.36962200 |
| C | -3.12186400 | -1.10612100 | 0.85615700  |
| N | -3.02806200 | 1.95383100  | -1.32115900 |
| N | -2.56878600 | 3.82976700  | -0.08104100 |
| N | -2.90149600 | -1.05248600 | 2.16544800  |
| N | -4.27387700 | -1.61427500 | 0.42094900  |
| H | 3.73160600  | 2.42223300  | -1.85496400 |
| H | 3.32079300  | 4.34485400  | -0.49286200 |
| H | 2.03268000  | -0.67499400 | 2.49176900  |
| H | 4.98035300  | -1.96825900 | 1.03320800  |
| H | -0.00046000 | -1.76723900 | -2.69210900 |
| H | -0.00152800 | -4.66299000 | 0.07233300  |
| H | -3.73032300 | 2.42353700  | -1.85517100 |
| H | -3.31840800 | 4.34640900  | -0.49373600 |
| H | -2.03291800 | -0.67355600 | 2.49194600  |
| H | -4.98124000 | -1.96573100 | 1.03373200  |
| H | -2.04627500 | 4.25298600  | 0.65846800  |
| H | -2.86931100 | 0.97671500  | -1.47068000 |
| H | 2.04863800  | 4.25174700  | 0.65934200  |
| H | 2.86970900  | 0.97579200  | -1.47107900 |
| H | 3.55921000  | -1.39268500 | 2.83725000  |
| H | 4.41448000  | -1.69798500 | -0.56502300 |
| H | -0.00175000 | -5.12754900 | -1.58332600 |
| H | -0.00117500 | -3.40528600 | -3.22453800 |
| H | -4.41528200 | -1.69605200 | -0.56457000 |
| H | -3.55975200 | -1.39050900 | 2.83761900  |

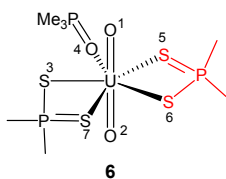

|   |             |             |             |
|---|-------------|-------------|-------------|
| U | -0.12458400 | -0.18583100 | -0.17725300 |
| P | 2.81694500  | -1.86472700 | 0.14022800  |
| P | 1.03268200  | 3.25465000  | 0.07874100  |
| S | 2.72750200  | -0.03600800 | -0.69428500 |
| S | 1.04708600  | -2.79431000 | 0.05681500  |
| C | 3.36762300  | -1.72670500 | 1.85375100  |
| C | 4.07827000  | -2.84795300 | -0.69070100 |
| C | 2.36460600  | 3.88622800  | -0.93755300 |
| C | -0.16501100 | 4.56626400  | 0.31012000  |
| O | 0.28945500  | 0.11408200  | 1.48510800  |
| O | -0.52542200 | -0.45759900 | -1.83725800 |
| O | 0.38011600  | 2.06700400  | -0.59005600 |
| S | -2.59509900 | 1.25418900  | 0.10651900  |
| S | -2.19540700 | -2.00158500 | 0.60185900  |
| C | 1.72860900  | 2.85701800  | 1.67761600  |
| P | -3.48223900 | -0.54920100 | 0.10307200  |
| C | -4.88858100 | -0.55264000 | 1.23181400  |
| C | -4.17781700 | -0.87002700 | -1.52974900 |
| H | 3.43189300  | -2.71607700 | 2.29665100  |
| H | 2.62513900  | -1.14357400 | 2.38881100  |
| H | 4.33119600  | -1.22783800 | 1.89759300  |
| H | 4.13420800  | -3.83064800 | -0.23176700 |
| H | 3.79503400  | -2.95152700 | -1.73199700 |
| H | 5.03801000  | -2.34395100 | -0.62416000 |
| H | 3.09662900  | 3.09404400  | -1.06525300 |
| H | 1.97073000  | 4.15698800  | -1.91190000 |
| H | 2.83673600  | 4.75057800  | -0.48032800 |
| H | -0.98874900 | 4.17661000  | 0.90125000  |
| H | -0.55077000 | 4.86746500  | -0.65854400 |
| H | 0.27459100  | 5.42284300  | 0.81196300  |
| H | 0.94408800  | 2.47449800  | 2.32206400  |
| H | 2.46215300  | 2.06764500  | 1.53606200  |
| H | 2.19472700  | 3.73014000  | 2.12450400  |
| H | -5.37197000 | -1.52478900 | 1.20484500  |
| H | -4.52269100 | -0.35964400 | 2.23378700  |
| H | -5.58953000 | 0.22552400  | 0.94434200  |
| H | -4.66587200 | -1.83998000 | -1.53639000 |
| H | -3.35786200 | -0.87417900 | -2.24072500 |
| H | -4.88151300 | -0.08608400 | -1.79287500 |

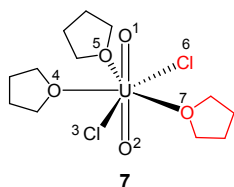

|    |             |             |             |
|----|-------------|-------------|-------------|
| U  | 0.15089600  | -0.04847400 | -0.05764800 |
| Cl | 0.57854400  | -2.67270600 | -0.33123700 |
| Cl | 1.17141700  | 2.41306400  | 0.27957800  |
| O  | 0.06467900  | -0.21789900 | 1.66726700  |
| O  | 0.14784500  | 0.14310900  | -1.78223100 |
| O  | -2.07972400 | -1.19774900 | 0.07049300  |

|   |             |             |             |
|---|-------------|-------------|-------------|
| O | 2.57000700  | -0.30692000 | -0.03374000 |
| O | -1.74450600 | 1.58320900  | -0.14708500 |
| C | -2.39790700 | -1.98569500 | 1.22853900  |
| H | -1.49962500 | -2.51680800 | 1.53160400  |
| H | -2.69998600 | -1.30703300 | 2.01857300  |
| C | -3.47998700 | -2.92991700 | 0.76725100  |
| H | -4.45562800 | -2.44984900 | 0.81023700  |
| H | -3.51450300 | -3.83269000 | 1.36758600  |
| C | -3.06933900 | -3.18014200 | -0.67238000 |
| H | -3.87025100 | -3.57043200 | -1.29154500 |
| H | -2.22621400 | -3.86445100 | -0.70854700 |
| C | -2.62272300 | -1.80713400 | -1.11041000 |
| H | -1.84648300 | -1.82933000 | -1.86810900 |
| H | -3.45231100 | -1.19109800 | -1.45144900 |
| C | 3.27894900  | -0.79245600 | 1.11445100  |
| H | 2.89524000  | -1.78083500 | 1.34285200  |
| H | 3.07168700  | -0.11585800 | 1.94008400  |
| C | 4.73326200  | -0.76459500 | 0.70743000  |
| H | 5.39195800  | -0.63564200 | 1.55961700  |
| H | 5.00242300  | -1.68830100 | 0.20077300  |
| C | 4.76641100  | 0.40171700  | -0.26429800 |
| H | 5.63049200  | 0.39441500  | -0.92030800 |
| H | 4.74208500  | 1.34634900  | 0.27344400  |
| C | 3.47361800  | 0.21056600  | -1.01628900 |
| H | 3.04701900  | 1.12830100  | -1.40408400 |
| H | 3.56407200  | -0.52556700 | -1.81206000 |
| C | -2.24793500 | 2.09935000  | 1.09257200  |
| H | -1.40007800 | 2.27971000  | 1.74996500  |
| H | -2.89517900 | 1.34508700  | 1.52736100  |
| C | -2.95082200 | 3.38357700  | 0.72601300  |
| H | -3.96861400 | 3.18423100  | 0.39698000  |
| H | -2.98838100 | 4.07837200  | 1.55815900  |
| C | -2.09925100 | 3.87255900  | -0.43095500 |
| H | -2.59660600 | 4.60699900  | -1.05579500 |
| H | -1.16738300 | 4.29137700  | -0.06105400 |
| C | -1.81339600 | 2.58987600  | -1.17029900 |
| H | -0.86872300 | 2.59338300  | -1.70007000 |
| H | -2.61844400 | 2.31700600  | -1.84978000 |

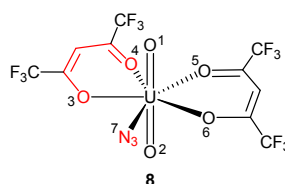

|   |             |             |             |
|---|-------------|-------------|-------------|
| U | 0.00000300  | -0.68295000 | 0.08771200  |
| N | 0.00004200  | -2.96042200 | 0.16619300  |
| N | 0.00094300  | -3.91282700 | -0.54521800 |
| N | 0.00176400  | -4.84671800 | -1.18688000 |
| O | -0.00043400 | -0.56134000 | 1.82035500  |
| O | 0.00035500  | -0.72313100 | -1.64778200 |
| O | 2.40976300  | -1.14791000 | 0.10393600  |
| O | 1.38177900  | 1.36652700  | -0.00779800 |
| O | -1.38202800 | 1.36658700  | -0.00808500 |
| O | -2.40950400 | -1.14823900 | 0.10353100  |
| C | 3.48003800  | -0.53542800 | 0.06272400  |
| C | 3.67862800  | 0.83659900  | -0.01334400 |
| C | 2.57381800  | 1.67833800  | -0.03998000 |
| C | 4.71076300  | -1.43791800 | 0.11784300  |

|   |             |             |             |
|---|-------------|-------------|-------------|
| C | 2.81362100  | 3.18513800  | -0.11648500 |
| C | -2.57415900 | 1.67804700  | -0.03977600 |
| C | -3.67878000 | 0.83603200  | -0.01320600 |
| C | -3.47991100 | -0.53595400 | 0.06246600  |
| C | -2.81439800 | 3.18481000  | -0.11583200 |
| C | -4.71043700 | -1.43872500 | 0.11738700  |
| F | 4.67287600  | -2.34419400 | -0.84476000 |
| F | 4.76471800  | -2.07678600 | 1.27803100  |
| F | 5.85195400  | -0.76185900 | -0.01504600 |
| F | 2.25349500  | 3.69055100  | -1.20478200 |
| F | 2.28509100  | 3.79444500  | 0.93394800  |
| F | 4.10737600  | 3.50368500  | -0.15094200 |
| F | -2.25591600 | 3.69035700  | -1.20495700 |
| F | -2.28448100 | 3.79418100  | 0.93382200  |
| F | -4.10826800 | 3.50309300  | -0.14845300 |
| F | -4.76423900 | -2.07788800 | 1.27742000  |
| F | -5.85178600 | -0.76290300 | -0.01534200 |
| F | -4.67235700 | -2.34477100 | -0.84542900 |
| H | 4.67121600  | 1.23757400  | -0.04714900 |
| H | -4.67145900 | 1.23680700  | -0.04667700 |

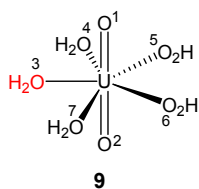

|   |             |             |             |
|---|-------------|-------------|-------------|
| U | 0.00598600  | -0.00042700 | 0.00000600  |
| O | 0.02759200  | 0.00022700  | -1.71238800 |
| O | 0.02760700  | -0.00338800 | 1.71238500  |
| O | 0.58908500  | -2.38470900 | 0.22257300  |
| O | -2.06449100 | -1.29873900 | -0.37306600 |
| O | -1.91868600 | 1.50563000  | 0.37338300  |
| O | 0.83284900  | 2.31106400  | -0.22323100 |
| O | 2.46382100  | -0.12677200 | 0.00027100  |
| H | 0.70691800  | -3.03654800 | -0.47004700 |
| H | -2.39021600 | -1.54674200 | -1.23969100 |
| H | -2.49483200 | 1.92019600  | -0.27039400 |
| H | 1.03403800  | 2.73816800  | -1.05741700 |
| H | 3.03468300  | -0.13040000 | -0.76967300 |
| H | 1.01852300  | 2.94677300  | 0.46948700  |
| H | 3.03148300  | -0.18332900 | 0.77051100  |
| H | 0.74421400  | -2.83058500 | 1.05678900  |
| H | -2.68082500 | -1.65106000 | 0.27057000  |
| H | -2.21691300 | 1.78631800  | 1.23993400  |

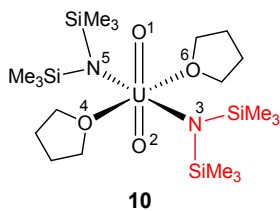

|   |             |             |             |
|---|-------------|-------------|-------------|
| U | 0.00000000  | 0.02003200  | 0.00000100  |
| O | -0.00724000 | 0.01825200  | 1.75934000  |
| N | 2.29778400  | -0.00722200 | -0.00041300 |

|    |             |             |             |
|----|-------------|-------------|-------------|
| Si | 3.10972000  | 0.46785400  | 1.46172600  |
| C  | 4.91058500  | 0.96196100  | 1.23187400  |
| H  | 5.58402100  | 0.11698300  | 1.13319000  |
| H  | 5.21580300  | 1.52454000  | 2.11339000  |
| H  | 5.05382600  | 1.60930800  | 0.36824300  |
| C  | 2.34762200  | 2.00612700  | 2.22791700  |
| H  | 1.32434000  | 1.85046300  | 2.55084700  |
| H  | 2.37561200  | 2.84678800  | 1.53653300  |
| H  | 2.93508500  | 2.28664800  | 3.10147000  |
| C  | 3.06198000  | -0.89991300 | 2.74093800  |
| H  | 2.03340900  | -1.13759700 | 3.00168000  |
| H  | 3.58095500  | -0.60732200 | 3.65216800  |
| H  | 3.53994800  | -1.80199500 | -2.36207900 |
| Si | 3.10333600  | -0.51079900 | -1.45743400 |
| C  | 4.89034200  | -1.04831500 | -1.21626100 |
| H  | 5.58282200  | -0.21957500 | -1.11172400 |
| H  | 5.18819000  | -1.61673400 | -2.09654900 |
| H  | 5.01272800  | -1.69985100 | -0.35260000 |
| C  | 3.09622100  | 0.85427600  | -2.74075100 |
| H  | 3.62845400  | 1.73294500  | -2.37920900 |
| H  | 2.07484800  | 1.14206500  | -2.97923100 |
| H  | 3.57890800  | 0.53212800  | -3.66189500 |
| C  | 2.31370000  | -2.02878500 | -2.23825700 |
| H  | 1.30003600  | -1.84579900 | -2.57646000 |
| H  | 2.31256600  | -2.87783600 | -1.55697400 |
| H  | 2.90727800  | -2.31334500 | -3.10649000 |
| O  | -0.00001100 | -2.41878400 | -0.00002100 |
| C  | 0.73560800  | -3.22947100 | 0.92484200  |
| H  | 0.58916000  | -2.81948300 | 1.91757400  |
| H  | 1.78974500  | -3.15990800 | 0.66623200  |
| C  | 0.18201300  | -4.62091800 | 0.73739700  |
| H  | -0.70658400 | -4.75588800 | 1.34939300  |
| H  | 0.90223700  | -5.38702400 | 1.00348100  |
| O  | 0.00002000  | 2.46747300  | 0.00001700  |
| C  | 0.80046300  | 3.27879600  | -0.86940800 |
| H  | 0.37663900  | 3.21976100  | -1.86911300 |
| H  | 1.80217100  | 2.86236200  | -0.87657500 |
| C  | 0.70136400  | 4.67001300  | -0.29100500 |
| H  | 0.85633000  | 5.43655400  | -1.04257500 |
| H  | 1.43706100  | 4.80729100  | 0.49772400  |
| O  | 0.00725400  | 0.01829100  | -1.75933900 |
| N  | -2.29778900 | -0.00720300 | 0.00041600  |
| Si | -3.10972500 | 0.46792700  | -1.46170900 |
| C  | -4.91057900 | 0.96206100  | -1.23182300 |
| H  | -5.58402700 | 0.11709300  | -1.13313700 |
| H  | -5.21580100 | 1.52465600  | -2.11332700 |
| H  | -5.05379500 | 1.60939900  | -0.36818300 |
| C  | -2.34760600 | 2.00620200  | -2.22787800 |
| H  | -1.32432700 | 1.85052800  | -2.55081600 |
| H  | -2.37557700 | 2.84685200  | -1.53648100 |
| H  | -2.93506800 | 2.28675000  | -3.10142300 |
| C  | -3.06203600 | -0.89981200 | -2.74095400 |
| H  | -2.03347700 | -1.13752100 | -3.00171300 |
| H  | -3.58101200 | -0.60718500 | -3.65217200 |
| H  | -3.54002900 | -1.80188600 | -2.36211000 |
| Si | -3.10335000 | -0.51082400 | 1.45742300  |
| C  | -4.89035300 | -1.04833200 | 1.21621500  |
| H  | -5.58283200 | -0.21959000 | 1.11168500  |
| H  | -5.18821300 | -1.61677100 | 2.09648700  |
| H  | -5.01272700 | -1.69985000 | 0.35253800  |
| C  | -3.09625200 | 0.85420900  | 2.74078700  |
| H  | -3.62848100 | 1.73289000  | 2.37926700  |

|   |             |             |             |
|---|-------------|-------------|-------------|
| H | -2.07488200 | 1.14198600  | 2.97928900  |
| H | -3.57895100 | 0.53203300  | 3.66191500  |
| C | -2.31372300 | -2.02883300 | 2.23821500  |
| H | -1.30005800 | -1.84585800 | 2.57642300  |
| H | -2.31259200 | -2.87787000 | 1.55691500  |
| H | -2.90730400 | -2.31341000 | 3.10643900  |
| C | -0.73562700 | -3.22946000 | -0.92489500 |
| H | -0.58918000 | -2.81945400 | -1.91761900 |
| H | -1.78976300 | -3.15990800 | -0.66628200 |
| C | -0.18202400 | -4.62090600 | -0.73747300 |
| H | 0.70657300  | -4.75586200 | -1.34947100 |
| H | -0.90224400 | -5.38701200 | -1.00357000 |
| C | -0.80040400 | 3.27881100  | 0.86944400  |
| H | -0.37658800 | 3.21975800  | 1.86915200  |
| H | -1.80212300 | 2.86240500  | 0.87660100  |
| C | -0.70126700 | 4.67002900  | 0.29105200  |
| H | -0.85621300 | 5.43656900  | 1.04262700  |
| H | -1.43696000 | 4.80733200  | -0.49767700 |

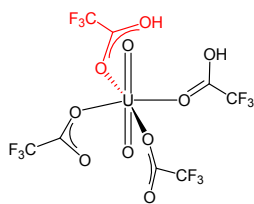

11-a

|   |             |             |             |
|---|-------------|-------------|-------------|
| U | -0.10854000 | -0.50425100 | -0.04649300 |
| O | -0.04496100 | -0.30324100 | -1.76025100 |
| O | -0.17816500 | -0.57102400 | 1.67755900  |
| O | 2.68149600  | -3.22276100 | -1.29968400 |
| O | 1.84268200  | -1.55470400 | -0.06739000 |
| C | 2.76370900  | -2.21507600 | -0.67455300 |
| C | 4.13169900  | -1.54068700 | -0.48803500 |
| F | 4.51478600  | -1.56998300 | 0.79037100  |
| F | 5.07207600  | -2.09050900 | -1.21073300 |
| F | 4.06223100  | -0.23864800 | -0.82514300 |
| O | 1.54646700  | 1.43917400  | 0.18301700  |
| O | 2.81538000  | 0.61123400  | 1.77117900  |
| C | 2.58361300  | 1.41205500  | 0.78442900  |
| C | 3.68424300  | 2.42408400  | 0.44308300  |
| F | 3.76045300  | 2.62433600  | -0.84269000 |
| F | 4.85372600  | 1.98563000  | 0.89497100  |
| F | 3.41074900  | 3.56572800  | 1.04827000  |
| O | -1.87615000 | -1.78195400 | -0.19399500 |
| O | -2.73711900 | -3.62809800 | 0.72384400  |
| C | -2.79730600 | -2.49910700 | 0.35972200  |
| C | -4.09754100 | -1.69635500 | 0.50150800  |
| F | -4.59758500 | -1.38644700 | -0.68936800 |
| F | -3.85885900 | -0.54335800 | 1.13788700  |
| F | -5.01282400 | -2.35056600 | 1.17832900  |
| O | -1.52604200 | 1.55634700  | -0.03866600 |
| O | -1.65891700 | 3.73492700  | -0.22082200 |
| C | -2.16461000 | 2.54094800  | -0.25499900 |
| C | -3.66899400 | 2.44454900  | -0.56004200 |
| F | -3.91458800 | 1.43923800  | -1.34895500 |
| F | -4.06266900 | 3.57485600  | -1.15244300 |
| F | -4.33635900 | 2.31773700  | 0.56222700  |
| H | 3.74747300  | 0.58206900  | 2.00297800  |
| H | -2.30830000 | 4.39524500  | -0.47514400 |

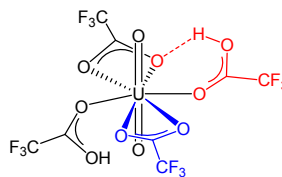

11-b

|   |             |             |             |
|---|-------------|-------------|-------------|
| U | 0.02066700  | 0.01007200  | -0.10688200 |
| O | 0.11040400  | -0.02630300 | -1.82528600 |
| O | -0.05232700 | 0.08035900  | 1.61234500  |
| O | -0.22122300 | 2.53417400  | -0.13491100 |
| O | 1.81736100  | 1.79023400  | -0.06246900 |
| C | 0.98769600  | 2.72862800  | -0.08384600 |
| C | 1.52319800  | 4.15820200  | -0.00161200 |
| F | 2.72221800  | 4.23702400  | -0.55120700 |
| F | 0.72007400  | 5.00291700  | -0.60928700 |
| F | 1.62666600  | 4.51339700  | 1.27089500  |
| O | -2.36077800 | 0.94876500  | -0.29399100 |
| O | -3.20688100 | 0.40424100  | 1.66195000  |
| C | -3.29547600 | 0.82108900  | 0.43654600  |
| C | -4.69563100 | 1.19584300  | -0.06920600 |
| F | -4.77684300 | 2.49610100  | -0.23485300 |
| F | -5.61149400 | 0.83013400  | 0.83014000  |
| F | -4.95195900 | 0.59277500  | -1.20014800 |
| O | 2.37967200  | -0.85773200 | 0.01946100  |
| O | 4.07896300  | 0.59014100  | 0.00911400  |
| C | 3.55168800  | -0.57836900 | 0.04597800  |
| C | 4.60888100  | -1.68237300 | 0.14312900  |
| F | 5.46905000  | -1.56969300 | -0.85226800 |
| F | 4.04926500  | -2.86432700 | 0.09594000  |
| F | 5.26693300  | -1.56066400 | 1.28320500  |
| O | 0.18233300  | -2.43826000 | -0.01438900 |
| O | -1.83385800 | -1.62000700 | -0.09635700 |
| C | -1.04586200 | -2.58047400 | -0.04400000 |
| C | -1.63100900 | -3.99300000 | -0.05108000 |
| F | -1.84877300 | -4.37499600 | -1.30141600 |
| F | -2.78377900 | -4.02283600 | 0.59538100  |
| F | -0.81036200 | -4.85449000 | 0.51160700  |
| H | -4.07269900 | 0.31682700  | 2.06593400  |
| H | 3.36215000  | 1.26626300  | -0.03391400 |

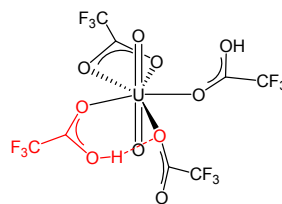

11-c

|   |             |             |             |
|---|-------------|-------------|-------------|
| U | 0.02318800  | 0.00085000  | -0.08431400 |
| O | 0.15049800  | -0.02566400 | -1.80054300 |
| O | -0.09076600 | 0.06146700  | 1.63317200  |
| O | -0.24478500 | 2.52434800  | -0.10646100 |
| O | 1.80065400  | 1.80233100  | -0.00712400 |
| C | 0.96115800  | 2.73192400  | -0.04301200 |
| C | 1.48388000  | 4.16614000  | 0.03614900  |
| F | 1.66359500  | 4.49579600  | 1.30707400  |
| F | 2.64597000  | 4.26983300  | -0.58512700 |
| F | 0.63608100  | 5.01361800  | -0.50190100 |
| O | -2.35475000 | 0.92247500  | -0.32688600 |

|   |             |             |             |
|---|-------------|-------------|-------------|
| O | -3.24388500 | 0.37043600  | 1.60787100  |
| C | -3.30445700 | 0.79936300  | 0.38490200  |
| C | -4.69024000 | 1.19709700  | -0.14173100 |
| F | -4.92287800 | 0.63292800  | -1.29721200 |
| F | -4.76179300 | 2.50276000  | -0.26611800 |
| F | -5.62805400 | 0.80733900  | 0.72426900  |
| O | 2.38820100  | -0.83968500 | 0.05835700  |
| O | 4.07119400  | 0.62602500  | -0.00057000 |
| C | 3.55772700  | -0.54811300 | 0.04472400  |
| C | 4.62736400  | -1.64418200 | 0.07069000  |
| F | 5.28986100  | -1.63685600 | -1.07309900 |
| F | 4.07916200  | -2.82045200 | 0.24023700  |
| F | 5.48118000  | -1.41844400 | 1.05222000  |
| O | 0.20399100  | -2.44620900 | 0.00809800  |
| O | -1.81659800 | -1.64591300 | -0.12455300 |
| C | -1.02188600 | -2.59897300 | -0.04141700 |
| C | -1.60936700 | -4.01014800 | -0.00630000 |
| F | -2.20095700 | -4.27799000 | -1.16059700 |
| F | -2.52046900 | -4.09728400 | 0.95189200  |
| F | -0.68348000 | -4.91708300 | 0.21163500  |
| H | 3.34616600  | 1.29542700  | -0.02026400 |
| H | -4.11852800 | 0.28338500  | 1.99275000  |
